# Supplementary material for: Stroma AReactive Invasion Front Areas (SARIFA)—A New Easily to Determine Biomarker in Colon Cancer—Results of a Retrospective Study
Source: MDPI journal article supplement (doi:10.3390/cancers13194880), 2021-09-29
Supplement: s1 [file s1]

**Table S1.** Clinicopathological characteristics of group C

| Variable                          |            | <i>n</i> = 49 | SARIFA-<br>positive<br>( <i>n</i> = 29) | SARIFA-<br>negative<br>( <i>n</i> = 20) | P-value |
|-----------------------------------|------------|---------------|-----------------------------------------|-----------------------------------------|---------|
| Median Age (years)                |            | 71 (61-77)    | 72 (61-78)                              | 71 (61-77)                              | 0.458   |
| MedianLymph Node<br>Harvest (n)   |            | 38 (29-49)    | 36 (28-53)                              | 39 (30-49)                              | 0.776   |
| MedianPositive Lymph<br>Nodes (n) |            | 0 (0-2)       | 1 (0-4)                                 | 0 (0-1)                                 | 0.992   |
| Sex                               |            |               |                                         |                                         | 0.842   |
|                                   | female     | 20 (41%)      | 12 (41%)                                | 8 (40%)                                 |         |
|                                   | male       | 29 (59%)      | 17 (59%)                                | 12 (60%)                                |         |
| T status                          |            |               |                                         |                                         | 0.042   |
|                                   | pT3        | 35 (71%)      | 12 (41%)                                | 15 (75%)                                |         |
|                                   | pT4        | 14 (29%)      | 17 (59%)                                | 5 (25%)                                 |         |
| Grading                           |            |               |                                         |                                         | 0.700   |
|                                   | low grade  | 41 (84%)      | 25 (86%)                                | 16 (80%)                                |         |
|                                   | high grade | 8 (16%)       | 4 (14%)                                 | 4 (20%)                                 |         |
| Vascular invasion                 |            |               |                                         |                                         | 0.234   |
|                                   | negative   | 36 (73%)      | 19 (66%)                                | 17 (85%)                                |         |
|                                   | positive   | 13 (27%)      | 10 (34%)                                | 3 (15%)                                 |         |
| Lymphatic invasion                |            |               |                                         |                                         | 0.512   |
|                                   | negative   | 37 (76%)      | 23 (79%)                                | 14 (70%)                                |         |
|                                   | positive   | 12 (24%)      | 6 (21%)                                 | 6 (30%)                                 |         |
| Location                          |            |               |                                         |                                         | 0.842   |
|                                   | right      | 28 (57%)      | 12 (41%)                                | 8 (40%)                                 |         |
|                                   | left       | 21 (43%)      | 17 (59%)                                | 12 (60%)                                |         |
| MMS                               |            |               |                                         |                                         | 1.000   |
|                                   | stabe      | 40 (95%)*     | 25 (96%)                                | 16 (94%)                                |         |
|                                   | instable   | 2 (5%)*       | 1 (4%)                                  | 1 (6%)                                  |         |
| Adjuvant Therapy                  |            |               |                                         |                                         | 0.272   |
|                                   | no         | 23 (47%)      | 13 (45%)                                | 13 (65%)                                |         |
|                                   | yes        | 26 (53%)      | 16 (55%)                                | 7 (35%)                                 |         |
| Death                             |            |               |                                         |                                         | 0.496   |
|                                   | no         | 39 (80%)      | 22 (76%)                                | 13 (65%)                                |         |
|                                   | yes        | 10 (20%)      | 7 (24%)                                 | 3 (15%)                                 |         |

**Table S2.** Spearman Corelation of morphological biomarkers

|               | Tumor budding | PDC         | SG     | Jass   |
|---------------|---------------|-------------|--------|--------|
| SARIFA        | 0.267         | 0.281       | 0.148  | 0.217  |
|               | 0.0633        | 0.0503      | 0.308  | 0.134  |
|               | 49            | 49          | 49     | 49     |
| Tumor budding |               | 0.710       | 0.250  | 0.253  |
|               |               | 0.000000200 | 0.0832 | 0.0788 |
|               |               | 49          | 49     | 49     |
| PDC           |               |             | 0.0671 | 0.102  |
|               |               |             | 0.645  | 0.482  |
|               |               |             | 49     | 49     |

|      |       |
|------|-------|
| SG   | 0.231 |
|      | 0.110 |
|      | 49    |
| Jass |       |

Legend: SARIFA, Stroma AReactive Invasion Front Areas; PDC, poorly differentiated clusters; SG, Stroma Grading ; Jass, Infiltration Classifiacion according to Jass

**Table S3.** Subgroup analyses of SARIFA in UICC stage II vs. III

|                                |                   | Group A + B |               |         |                    |
|--------------------------------|-------------------|-------------|---------------|---------|--------------------|
| Overall survival               |                   | HR          | 95%CI         | p value | p value (log rank) |
|                                | Stage II (n=340)  | 1.299       | 0.696 – 2.424 | 0.411   | 0.409              |
|                                | Stage III (n=140) | 1.707       | 1.083 – 2.692 | 0.021   | 0.020              |
| Colon-cancer-specific survival |                   |             |               |         |                    |
|                                | Stage II (n=340)  | 0.832       | 0.188 – 3.675 | 0.808   | 0.808              |
|                                | Stage III (n=140) | 2.432       | 1.196 – 4.948 | 0.014   | 0.011              |
| Metastasis-free survival       |                   |             |               |         |                    |
|                                | Stage II (n=340)  | 1.172       | 0.487-2.817   | 0.724   | 0.723              |
|                                | Stage III (n=140) | 1.916       | 1.168-3.144   | 0.010   | 0.009              |

HR: Hazard Ratio of SARIFA positive cases - Reference: SARIFA negative cases; CI: Confidence intervall (95%)

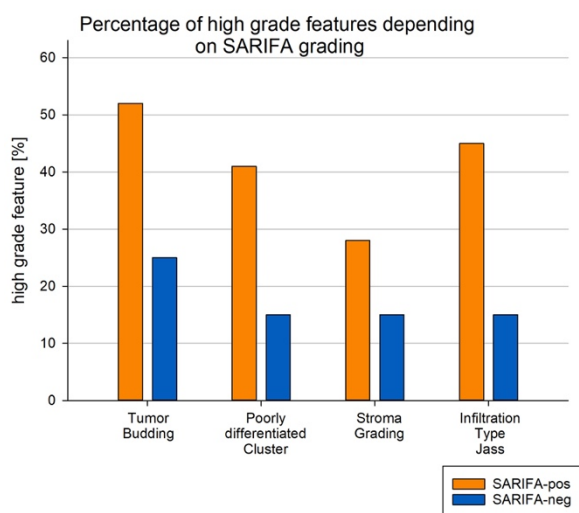

**Figure S1** Percentage of high-grade features of morphological biomarkers depending on the SRAIFA grading in group C
